# Supplementary material for: Sr3GdNa(PO4)3F:Eu2+,Mn2+: a potential color tunable phosphor for white LEDs
Source: Royal Society of Chemistry journal article supplement (doi:10.1039/c3tc31837k), 2013-10-23
Supplement: c3tc31837k.pdf [file c3tc31837k.pdf]

## **Supporting Information**

**Title:**  $\text{Sr}_3\text{GdNa}(\text{PO}_4)_3\text{F}:\text{Eu}^{2+},\text{Mn}^{2+}$ : A potential color tunable phosphor for white LEDs

**Author(s):** Mengmeng Jiao<sup>a,b</sup>, Yongchao Jia<sup>a,b</sup>, Wei Lü<sup>a</sup>, Wenzhen Lv<sup>a,b</sup>, Qi Zhao<sup>a,b</sup>, Baiqi Shao<sup>a,b</sup>, and Hongpeng You<sup>a,\*</sup>

<sup>a</sup> State Key Laboratory of Rare Earth Resource Utilization, Changchun Institute of Applied Chemistry, Chinese Academy of Sciences, Changchun 130022, P. R. China.

<sup>b</sup> University of the Chinese Academy of Sciences, Beijing 100049, P. R. China.

\*Corresponding author: E-mail: hpyou@ciac.ac.cn (H.Y.)

Table S1. Final refined structure parameters of SGNPF derived from the Rietveld

refinement of X-ray diffraction data

| Atom | Wyckoff position | x          | Y          | z          | Frac | Uiso  |
|------|------------------|------------|------------|------------|------|-------|
| Gd1  | 2d               | 0.33330(0) | 0.66670(0) | 0.52168(6) | 1.00 | 0.025 |
| Na1  | 2d               | 0.33330(0) | 0.66670(0) | 0.06343(3) | 1.00 | 0.025 |
| Sr1  | 6g               | 0.24017(1) | 0.25491(5) | 0.24894(0) | 1.00 | 0.025 |
| P1   | 6g               | 0.37790(5) | 0.41299(6) | 0.74358(0) | 1.00 | 0.025 |
| O1   | 6g               | 0.48997(2) | 0.34390(2) | 0.79081(5) | 1.00 | 0.025 |
| O2   | 6g               | 0.45383(7) | 0.59344(9) | 0.78831(9) | 1.00 | 0.025 |
| O3   | 6g               | 0.25982(2) | 0.30814(5) | 0.89823(8) | 1.00 | 0.025 |
| O4   | 6g               | 0.25641(9) | 0.35467(1) | 0.55275(2) | 1.00 | 0.025 |
| F1   | 2c               | 0.0000     | 0.0000     | 0.22180(0) | 1.00 | 0.025 |

Cell parameters:  $a = b = 9.5728 \text{ \AA}$ ,  $c = 7.1167 \text{ \AA}$ ,  
 $V = 564.795 \text{ \AA}^3$ ;  $Z = 2$ ;  
 space group:  $P-3$  (no.147);  
 Reliability factors:  $\chi^2 = 3.009$ ,  $R_{\text{wp}} = 4.24\%$ ,  $R_p = 3.22\%$

Table S2. Final refined structure parameters of SGNPF:0.01Eu<sup>2+</sup> derived from the

Rietveld refinement of X-ray diffraction data

| Atom | Wyckoff position | x          | Y          | z          | Frac | Uiso  |
|------|------------------|------------|------------|------------|------|-------|
| Gd1  | 2d               | 0.33330(0) | 0.66670(0) | 0.51901(5) | 1.00 | 0.025 |
| Na1  | 2d               | 0.33330(0) | 0.66670(0) | 0.06391(9) | 1.00 | 0.025 |
| Sr1  | 6g               | 0.23944(2) | 0.25431(2) | 0.24382(8) | 0.99 | 0.025 |
| P1   | 6g               | 0.37002(6) | 0.40574(8) | 0.74255(4) | 1.00 | 0.025 |
| O1   | 6g               | 0.49646(1) | 0.34802(0) | 0.76985(5) | 1.00 | 0.025 |
| O2   | 6g               | 0.43936(4) | 0.57095(1) | 0.78364(7) | 1.00 | 0.025 |
| O3   | 6g               | 0.26381(6) | 0.32924(4) | 0.91154(6) | 1.00 | 0.025 |
| O4   | 6g               | 0.25304(6) | 0.34151(4) | 0.56235(5) | 1.00 | 0.025 |
| F1   | 2c               | 0.0000     | 0.0000     | 0.22591(9) | 1.00 | 0.025 |
| Eu1  | 6g               | 0.23944(2) | 0.25431(2) | 0.24382(8) | 0.01 | 0.025 |

Cell parameters:  $a = b = 9.5749 \text{ \AA}$ ,  $c = 7.1138 \text{ \AA}$ ,  
 $V = 564.804 \text{ \AA}^3$ ;  $Z = 2$ ;  
 space group:  $P-3$  (no.147);

Reliability factors:  $\chi^2 = 3.139$ ,  $R_{wp} = 3.76\%$ ,  $R_p = 2.80\%$

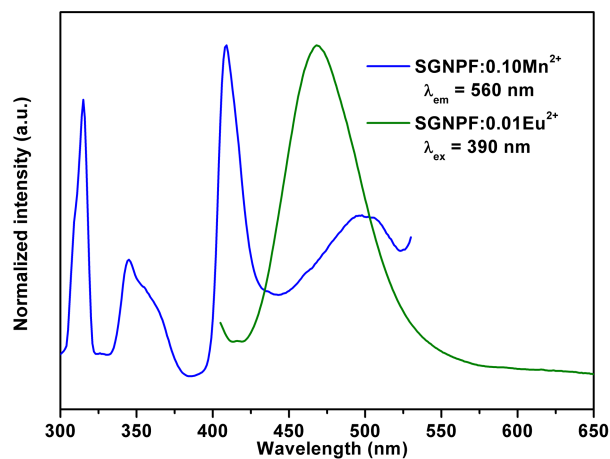

Figure S1. Spectra overlap between the PL of SGNPF:0.01Eu<sup>2+</sup> and PLE of SGNPF:0.10Mn<sup>2+</sup> phosphors.

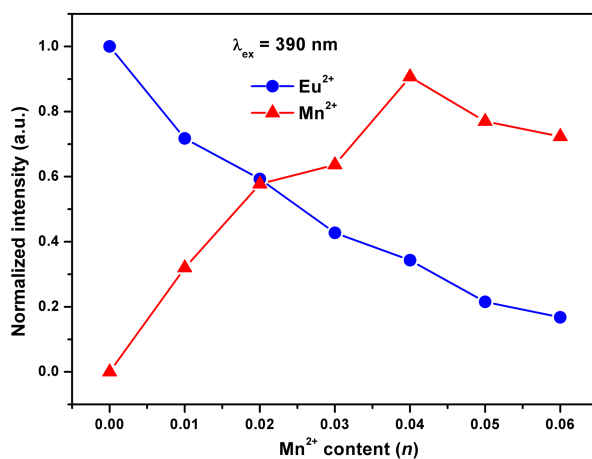

Figure S2. Relative emission intensity of the Eu<sup>2+</sup> and Mn<sup>2+</sup> ions in SGNPF:0.01Eu<sup>2+</sup>,  $n$ Mn<sup>2+</sup> phosphors with different Mn<sup>2+</sup> content.
